# Supplementary material for: Rapid and accurate determination of atomistic RNA dynamic ensemble models using NMR and structure prediction
Source: Springer Nature journal article supplement (doi:10.1038/s41467-020-19371-y), 2020-11-02
Supplement: MOESM1 [file 41467_2020_19371_MOESM1_ESM.pdf]

Supplementary Information

**Rapid and accurate determination of atomistic RNA dynamic ensemble  
models using NMR and structure prediction**

Honglue Shi<sup>1</sup>, Atul Rangadurai<sup>2</sup>, Hala Abou Assi<sup>2,3</sup>, Rohit Roy<sup>4</sup>, David A. Case<sup>5\*</sup>, Daniel  
Herschlag<sup>6,7,8\*</sup>, Joseph D. Yesselman<sup>9\*</sup>, Hashim M. Al-Hashimi<sup>1,2\*</sup>

<sup>1</sup>Department of Chemistry, Duke University, Durham, NC, 27710, USA

<sup>2</sup>Department of Biochemistry, Duke University School of Medicine, Durham, NC, 27710, USA

<sup>3</sup>Department of Medicine, Duke University School of Medicine, Durham NC, 27710, USA

<sup>4</sup>Center for Genomic and Computational Biology, Duke University School of Medicine, Durham, NC,  
27710, USA

<sup>5</sup>Department of Chemistry and Chemical Biology, Rutgers University, Piscataway, NJ, 08854, USA

<sup>6</sup>Department of Biochemistry, Stanford University, Stanford, CA, 94305, USA

<sup>7</sup>Department of Chemical Engineering, Stanford University, Stanford, CA, 94305, USA

<sup>8</sup>ChEM-H Institute, Stanford University, Stanford, CA, 94305, USA

<sup>9</sup>Department of Chemistry, University of Nebraska-Lincoln, Lincoln, NE, 68588, USA

Correspondence to: hashim.al.hashimi@duke.edu, jyesselm@unl.edu,  
herschla@stanford.edu, david.case@rutgers.edu

## Supplementary Figures

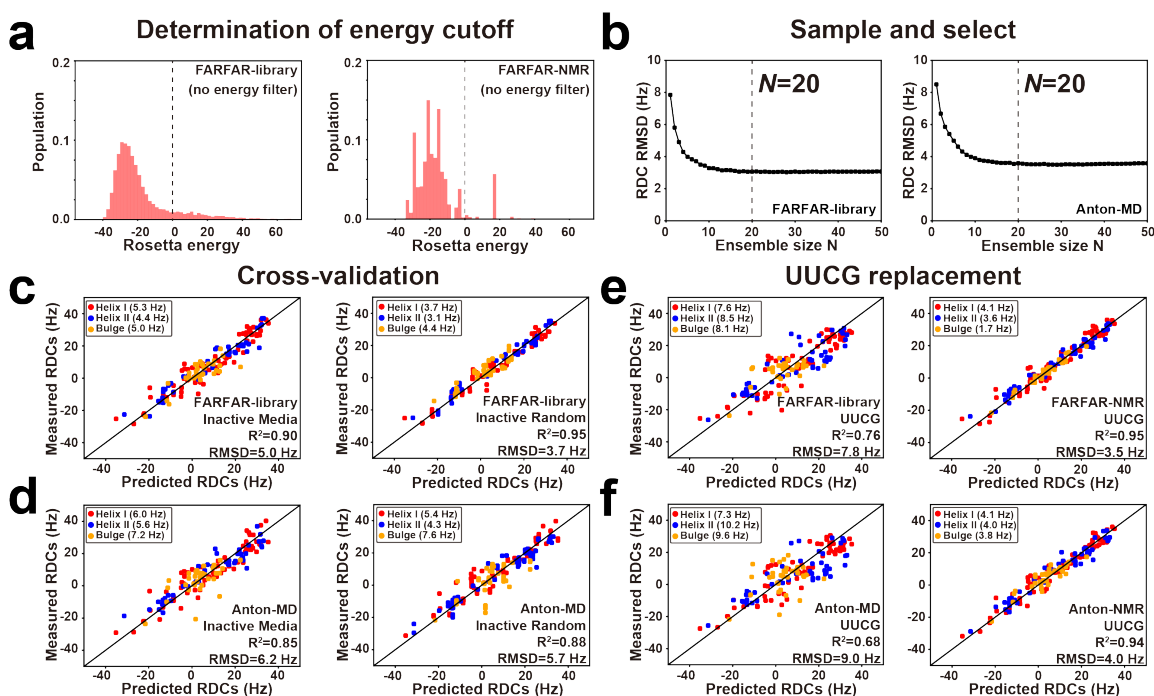

**Supplementary Fig. 1 Optimizing TAR ensembles using SAS.** (a) Determination of Rosetta energy cutoff. (left) Shown are the distribution of energies of a FARFAR-library (no energy filter) ( $N = 10,000$ ) generated without pre-filtering based on Rosetta energy (i.e., not excluding structures with Rosetta energy  $> 0$ ). (right) Distribution of no pre-filtering FARFAR-library in (left) after RDC selection ( $N = 2,000$ ). The Rosetta energy = 0 is indicated using a dashed line. As structures with energy  $> 0$  were predominantly excluded following SAS, only structures with energy  $< 0$  were retained while generating the FARFAR-library in the main manuscript. (b) RDC RMSD as a function of ensemble size ( $N$ ) during SAS for (left) the FARFAR-library and (right) Anton-MD. The chosen ensemble size  $N = 20$  is indicated using a vertical dashed line. (c-d) Cross-validation analysis of TAR ensembles. Shown are comparison of measured and predicted RDCs obtained from cross-validation analysis on TAR ensembles using two modes: Inactive Media (left) and Inactive Random (right)(Methods) for (c) the FARFAR-library and (d) Anton-MD. (e-f) Generation of TAR ensembles using UUCG apical loop models<sup>1</sup>.

Comparison between measured and predicted RDCs for starting pools with  $N = 10,000$  (left) and comparison between measured and predicted RDCs after SAS with  $N = 20$  (right) from (e) FARFAR-library replacing wild-type CUGGGA loop with a UUCG loop and (f) Anton-MD replacing wild-type CUGGGA loop with a UUCG loop. Replacing the loop with the UUCG loop used to measure RDCs minimally impacted the RDC agreement for both FARFAR and Anton ensembles.

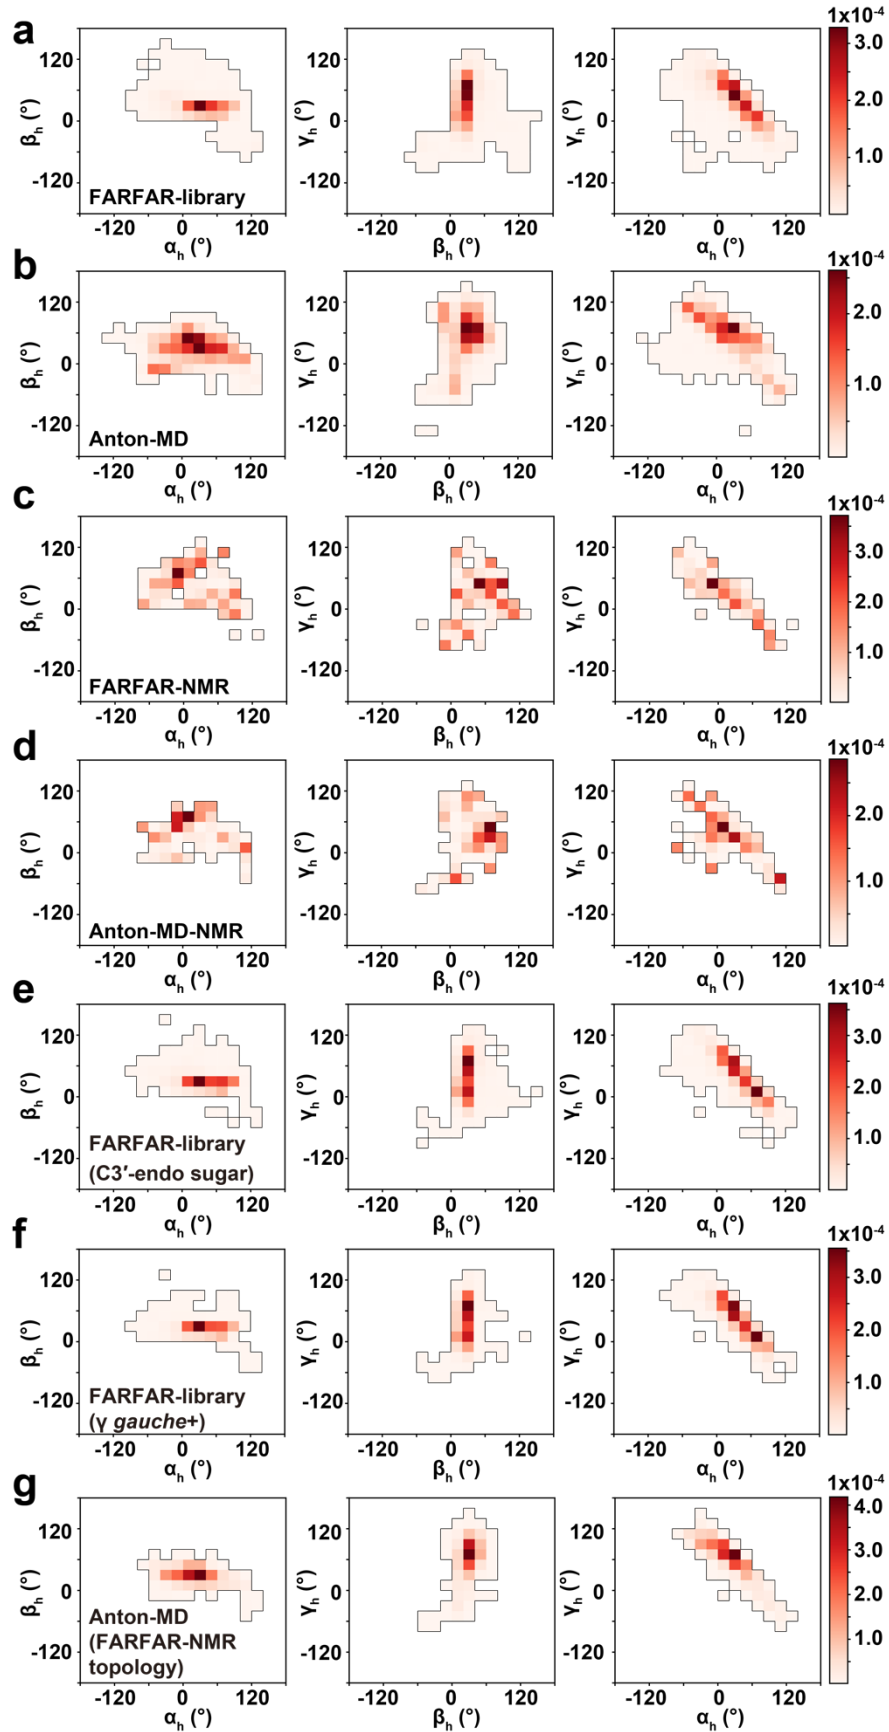

**Supplementary Fig. 2 Inter-helical orientational distributions of FARFAR and Anton libraries and ensembles.** The 2D density map of inter-helical Euler angle ( $\alpha_h, \beta_h, \gamma_h$ ) for (a) FARFAR-library ( $N = 10,000$ ), (b) Anton-MD ( $N = 10,000$ ), (c) FARFAR-NMR ( $N = 2,000$ ), (d) Anton-MD-NMR ( $N = 2,000$ ), (e-f) two subsets of FARFAR-library: (e) one with U23, C24, U25, A22 and U40 constrained to be C3'-*endo* ( $N = 4,422$ ), and (f) the other one with U23, C24, U25, A22 and U40 constrained to be only *gauche+*  $\gamma$  ( $20^\circ < \gamma < 100^\circ$ ) ( $N = 3,145$ ), (g) a subset of Anton-MD with conformers retaining the same junction topology as that in FARFAR-NMR (Methods) ( $N = 2,074$ ). The color-scale for density is given on the right. In all cases, the bin width is  $20^\circ$ .

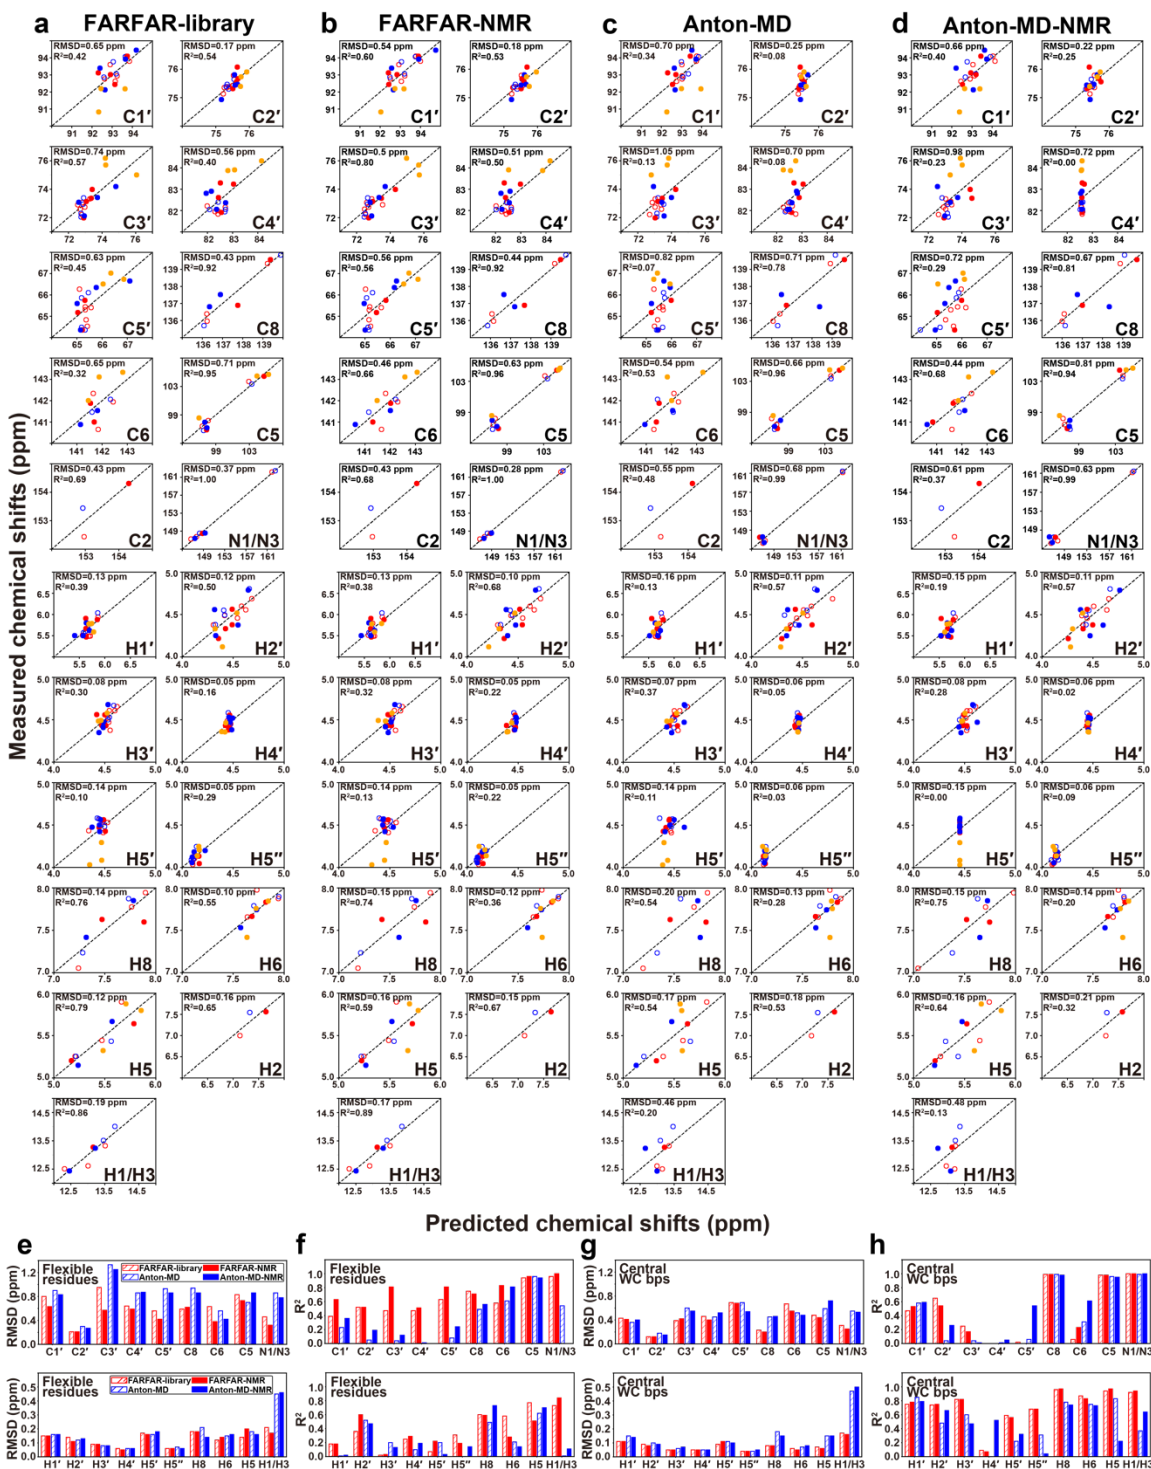

**Supplementary Fig. 3 Evaluation of TAR libraries and ensembles via  $^{13}\text{C}$ ,  $^{15}\text{N}$  and  $^1\text{H}$  chemical shifts.** (a-d) Comparison of measured and predicted  $^{13}\text{C}$ ,  $^{15}\text{N}$  and  $^1\text{H}$  chemical shifts for (a) FARFAR-library, (b) the FARFAR-NMR ensemble, (c) Anton-MD, and (d)

the Anton-MD-NMR ensemble ( $N = 20$  in all cases) by AF-QM/MM (Methods). Chemical shifts are color-coded according to the different structural elements (Fig. 2a). Chemical shifts for the central Watson-Crick bps within A-form helices (C19-G43, A20-U42, G21-C41, A27-U38, G28-C37) are denoted using open circles. A correction was applied to the predicted chemical shifts (Methods) as described previously<sup>2</sup>. (e-h) Comparison of RMSD and  $R^2$  between measured and predicted  $^{13}\text{C}/^{15}\text{N}$  (top) and  $^1\text{H}$  (below) chemical shifts for (e-f) flexible residues (U23, C24, U25, A22-U40, G26-C39, C29-G36, G18-C44) and (g-h) central Watson-Crick bps for the FARFAR-library (red, open), FARFAR-NMR ensemble ( $N = 20$ ) (red, fill), Anton-MD (blue, open) and the Anton-MD-NMR ensemble ( $N = 20$ ) (blue, fill).

## Flexible residues

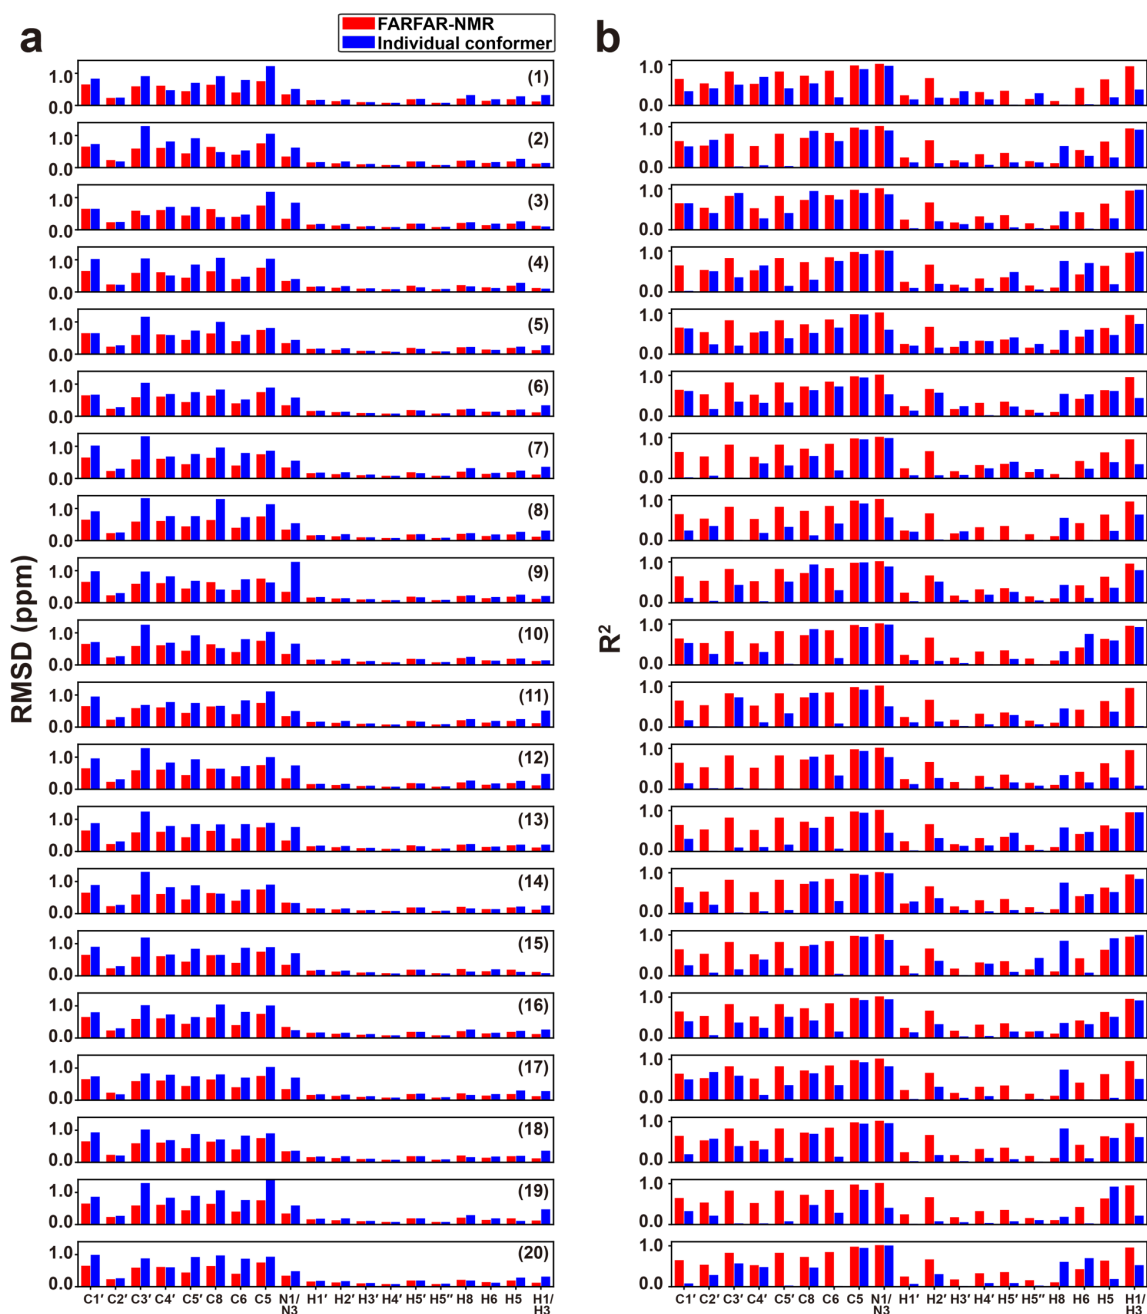

**Supplementary Fig. 4 Comparison of agreement of measured and predicted chemical shifts between FARFAR-NMR ensemble and individual conformers.** Bar plot of (a) RMSD and (b) R<sup>2</sup> between measured and predicted chemical shifts for FARFAR-NMR ensemble (red) and its individual conformer (blue) for only flexible residues (U23, C24,



U25, A22-U40, G26-C39, C29-G36, G18-C44). All the conformers in FARFAR-NMR ensemble ( $N = 20$ ) are sorted in increasing order of the bend angle magnitude  $|\beta_h|$ .

## a FARFAR-NMR

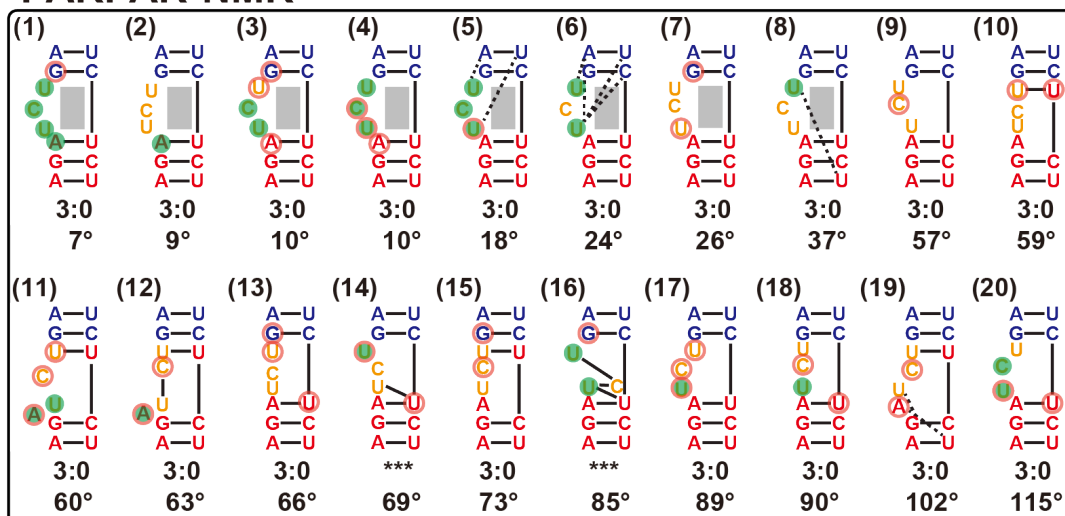

## b Anton-MD-NMR

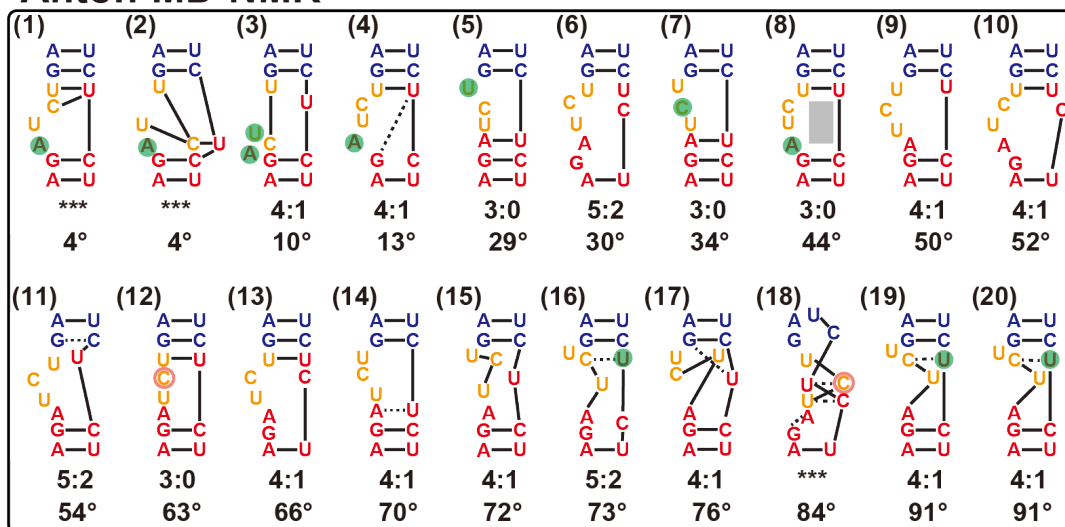

**Supplementary Fig. 5 Junction topology scheme of the TAR ensembles.** Junction topology in the (a) FARFAR-NMR ( $N = 20$ ) and (b) Anton-MD-NMR ( $N = 20$ ) ensembles. Conformers in each ensemble are sorted in increasing order of the bend angle magnitude  $|\beta_h|$ , and the junction topology (Methods) as well as the  $|\beta_h|$  are labeled below each conformer. Junctional residues (bulge/A22-U40/G26-C39) with C2'-endo sugar pucker and non-gauche+  $\gamma$  (falling outside 20-100°) torsion angle are highlighted with green filled circle and orange open circle, respectively.

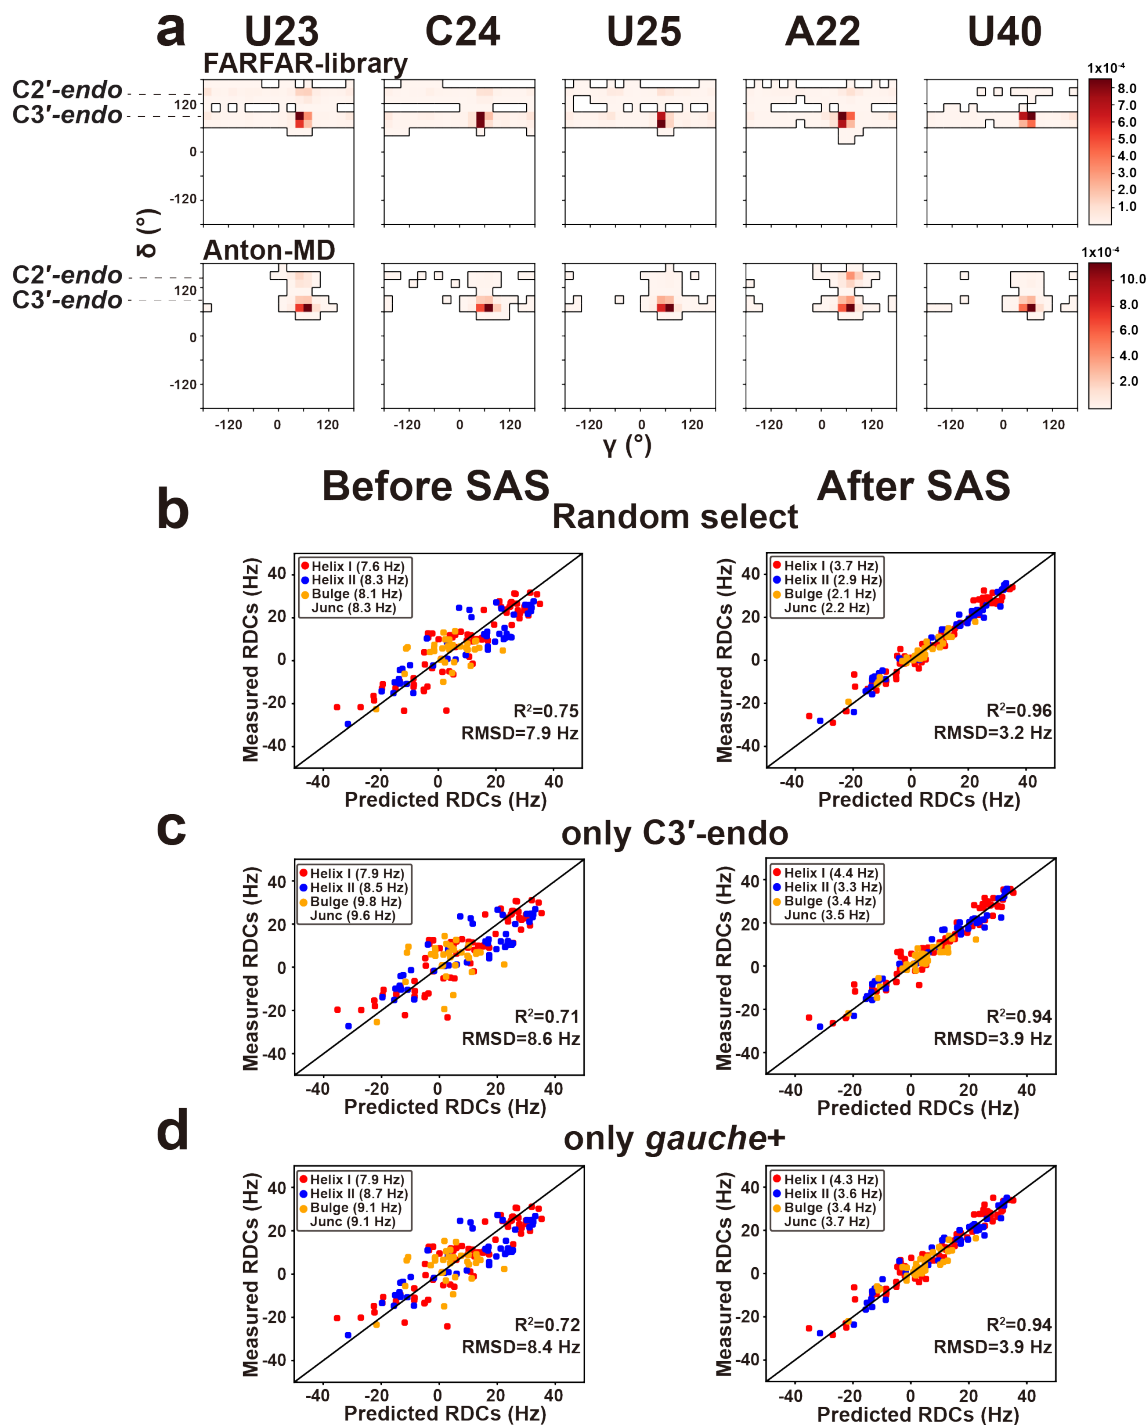

**Supplementary Fig. 6 Testing the sensitivity of FARFAR-library and FARFAR-NMR ensembles to variations in local torsion angles.** (a) Distribution of backbone torsion angles of the FARFAR-library and Anton-MD. 2D density map of  $\delta$  versus  $\gamma$  of the bulge residues as well as A22 and U40, for the FARFAR-library and Anton-MD ( $N = 10,000$ ).

The bin width is  $20^\circ$  for all density maps. (b-d) Comparison of measured and predicted RDCs for a subset of the FARFAR-library (left,  $N = 3,000$ ) and ensembles (right,  $N = 20$ ) following SAS on these subset libraries. (b) Randomly selected subset from the FARFAR-library (c) a subset of the FARFAR-library with the sugar puckers of U23, C24, U25, A22 and U40 chosen to be C3'-*endo* (d) a subset of the FARFAR-library with the  $\gamma$  torsion angles of U23, C24, U25, A22 and U40 chosen to be *gauche+* ( $20^\circ < \gamma < 100^\circ$ ). “Junc” denotes bulge residues as well as A22 and U40.

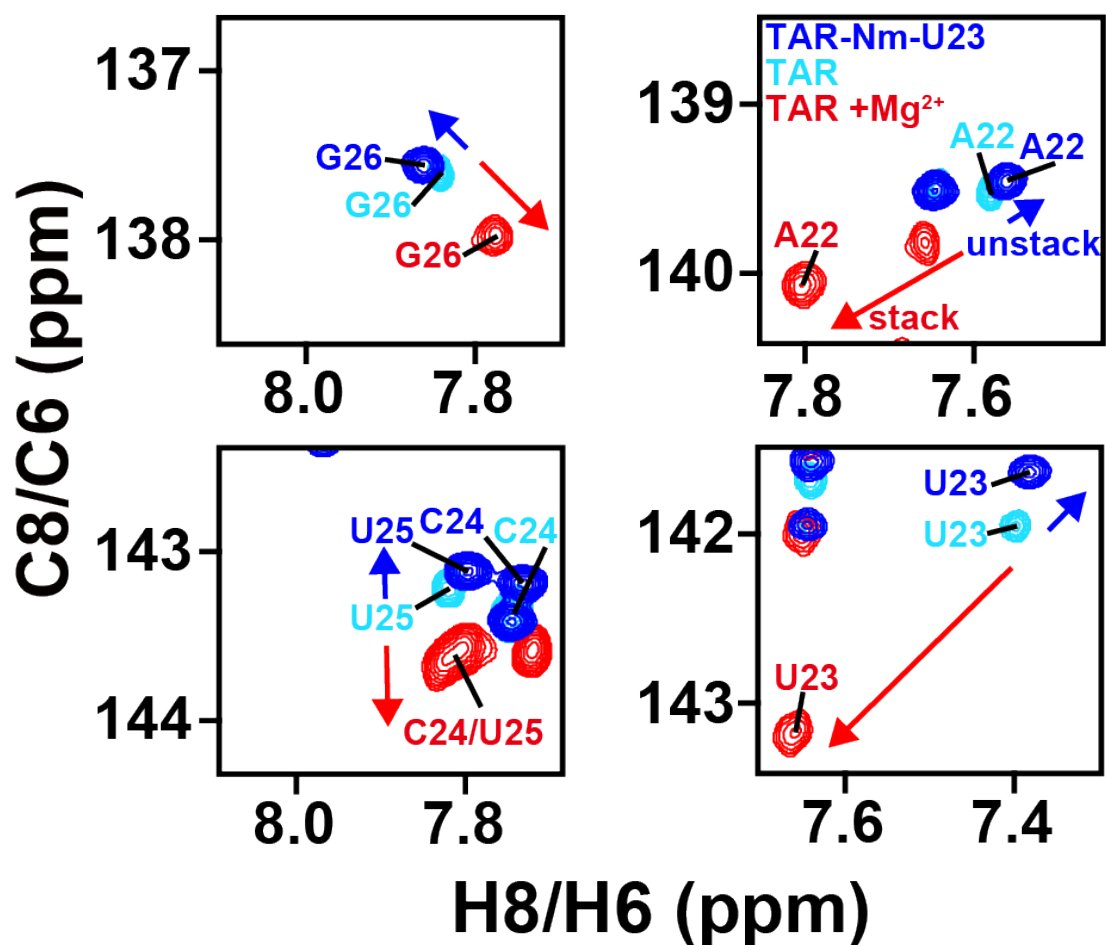

**Supplementary Fig. 7 An additional Nm modified TAR showing Nm inducing unstack of TAR.** Overlay of 2D [ $^{13}\text{C}$ ,  $^1\text{H}$ ] HSQC NMR spectra of the aromatic region of TAR-Nm-U23 without  $\text{Mg}^{2+}$  (blue, inducing unstacking). TAR without  $\text{Mg}^{2+}$  (cyan), and TAR +  $\text{Mg}^{2+}$  (red, inducing stacking).

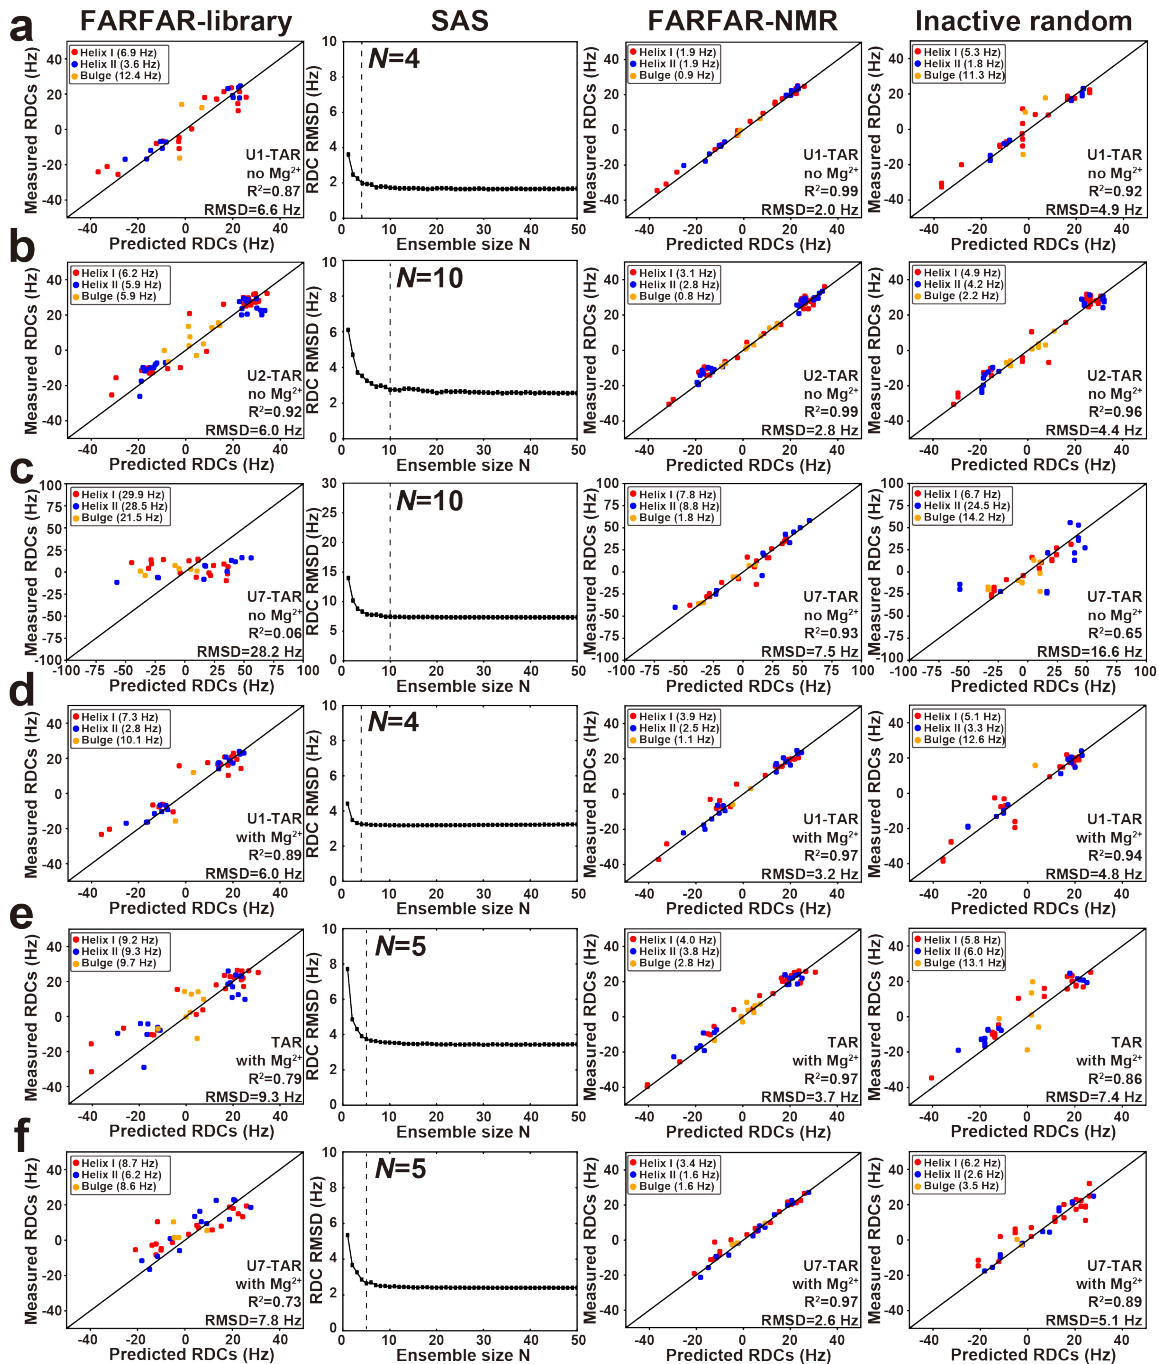

**Supplementary Fig. 8 Optimizing ensembles of TAR and its variants.** From left to right, comparison of measured and predicted RDCs for the FARFAR-library ( $N = 10,000$ ), RDC RMSD as a function of ensemble size during SAS (ensemble size  $N$  chosen for the final ensembles is indicated as a vertical dashed line), comparison between the measured and predicted RDCs for the FARFAR-NMR ensembles after SAS, and inactive RDCs random

cross-validation for (a) U1-TAR no  $\text{Mg}^{2+}$  (b) U2-TAR no  $\text{Mg}^{2+}$  (c) U7-TAR no  $\text{Mg}^{2+}$  (d) U1-TAR with  $\text{Mg}^{2+}$  (e) TAR with  $\text{Mg}^{2+}$  and (f) U7-TAR with  $\text{Mg}^{2+}$ . RDC values are color coded according to structural element as defined in Fig. 2a and Fig. 6a.

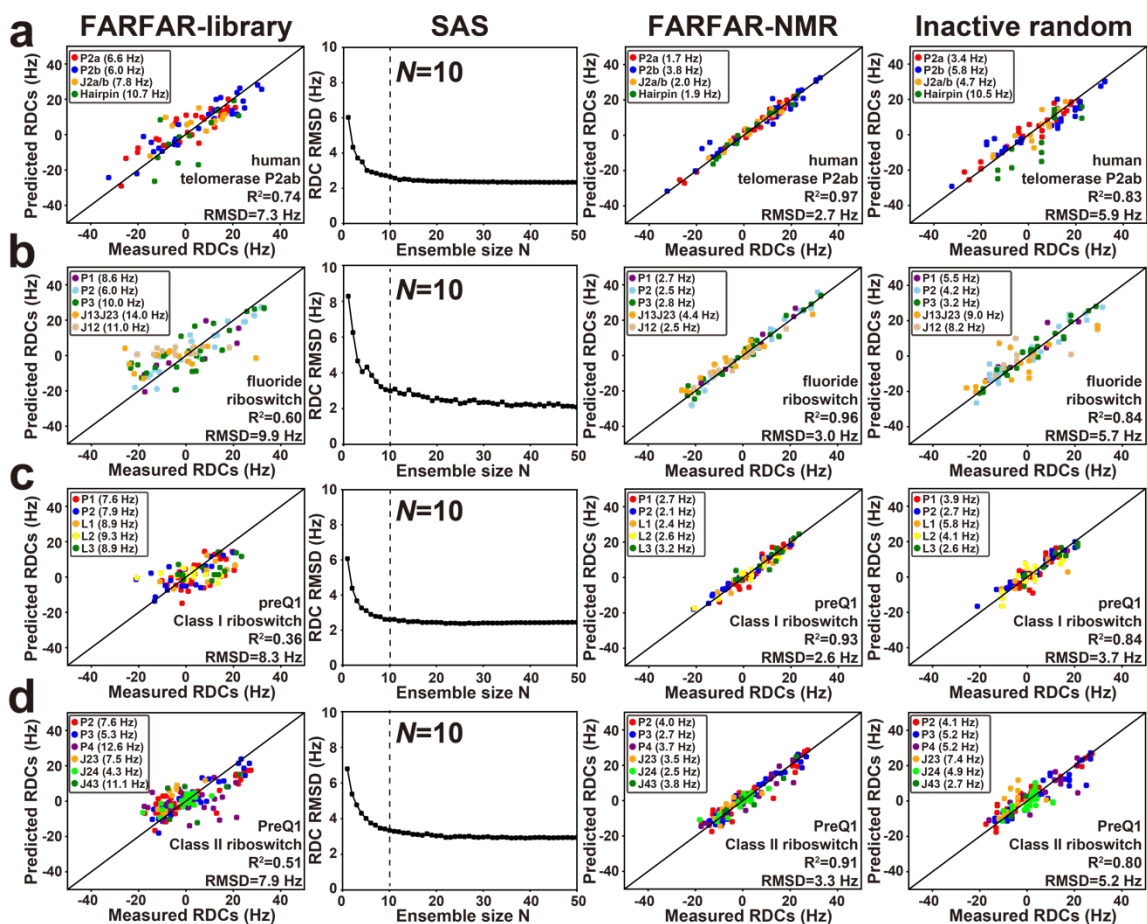

**Supplementary Fig. 9 Optimizing ensembles of other RNAs.** From left to right, comparison of measured and predicted RDCs for the FARFAR-library ( $N = 10,000$ ), RDC RMSD as a function of predicted of ensemble size during SAS (ensemble size  $N$  chosen for the final ensembles is indicated as a vertical dashed line), comparison between the measured and predicted RDCs for the FARFAR-NMR ensembles after SAS, and inactive random cross-validation for (a) human telomerase P2ab (b) fluoride riboswitch (c) preQ1 Class I riboswitch (d) preQ1 Class II riboswitch. RDC values are color coded according to structural element as defined in Fig. 7a.



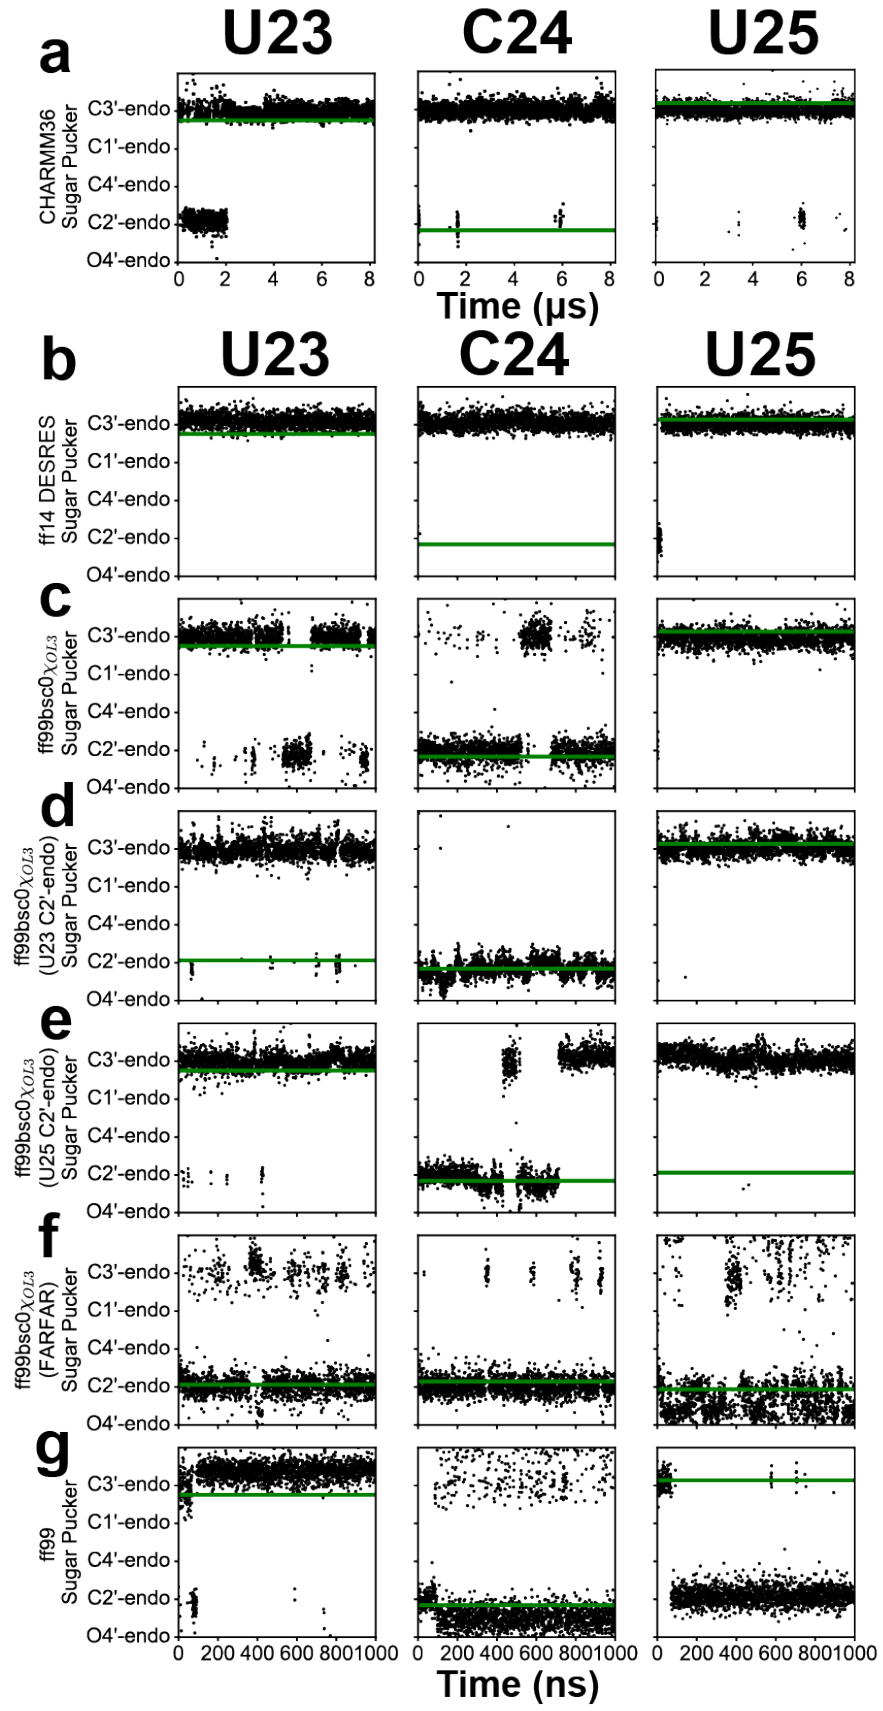

**Supplementary Fig. 10 Sugar puckers of bulge nucleotides during the course of MD simulations with different force fields and starting structures.** The variation of the sugar puckers of U23, C24 and U25 of TAR during the course of (a) an 8.2  $\mu$ s trajectory using the Anton CHARMM36 force field and (b-g) a series of 1.0  $\mu$ s trajectories using the (b) ff14 DESRES force field starting with the NOE structure (PDB: 1ANR), (c-f) ff99bsc0 $\chi$ OL3 force field starting with (c) the NOE structure (PDB 1ANR), (d) 1ANR with the pucker of U23 changed to *C2'-endo* (TAR<sup>U23C2'-endo</sup>), (e) 1ANR with the pucker of U25 sugar changed to *C2'-endo* (TAR<sup>U25C2'-endo</sup>), (f) a FARFAR-NMR conformer in which all bulge nucleotides are *C2'-endo* (TAR<sup>FARFAR</sup>), and (g) the ff99 force field. The sugar pucker of the starting structures are indicated using a green line. Persistence of a general bias towards *C3'-endo* or a tendency to maintain the sugar pucker in the initial starting conformation can be seen.

## Supplementary Discussion

### Implication of motional averaging on A-form helix

As expected, very good agreement was observed for both FARFAR and Anton-MD derived ensembles for the central Watson-Crick bps in the two helices (C19-G43, A20-U42, G21-C41, A27-U38, G28-C37), which have more rigid structures and thus should be easier to model. The slightly better agreement observed for C5', C6 and C1' chemical shifts for the Anton-MD-NMR as compared to the FARFAR-NMR (Supplementary Fig. 3) is presumably due to deviations from the assumed idealized static A-form geometry and/or motional averaging of the chemical shifts. Single conformers in the Anton-MD-NMR ensemble show slightly weaker agreement (overall RMSD difference < 0.22 ppm) compared to averaging over all conformers in the ensemble, including for C5', C6 and C1', suggesting that the better agreement in the case of Anton-MD-NMR is more likely due to neglect of motional averaging for the helices in the FARFAR-NMR ensemble.

### Junctional topology dynamics of FARFAR-NMR and Anton-MD-NMR

In the FARFAR-NMR ensemble, the major topology (~75%) of the two-way junction is the canonical trinucleotide U23C24U25 bulge (3:0) (Supplementary Fig. 5a e.g. conformer (5)). However, there is also a minor topology (~25%) in which the trinucleotide bulge migrates one nucleotide down the lower stem to form a AUC bulge (Supplementary Fig. 5a e.g. conformer (10)). In contrast, in the Anton-MD-NMR ensemble for TAR, the topology of the junction varies widely (Supplementary Fig. 5b). The dominant topology (~30%) is the 4:1 internal loop lacking A22-U40 pairing and the U23C24U25 bulge, while the 3:0 internal loop with UCU bulge and a A22-U40 bp is only a minor population (~10%). The absence of base-pairing at A22-U40 is in agreement with the NMR data showing no detectable hydrogen bonds between A22 and U40. The Anton-MD-NMR topologies also include 3:0 or 4:1 internal loops (~30%) in which U25 and U40 form a U25-U40 mismatch with A22-U40 unpaired or both A22-U40 and G21-

C41 unpaired, respectively. In addition, topologies with a 5:2 internal loop (~15%) in which A22-U40 as well as either G21-C41 or G26-C39 are unpaired, and those in which the entire upper helix is melted (~5 %) are also observed. Unpairing in the upper helix and at G21-C41 and G26-C39 is inconsistent with the sharp imino resonances observed for G21 and G26<sup>3</sup>. These differences in pairing may help explain the better predictions of imino <sup>15</sup>N/<sup>1</sup>H chemical shifts for the FARFAR-NMR relative to the Anton-MD-NMR ensemble (Fig. 3 and Supplementary Fig. 3). Thus, artifactual distortions in junction topology and helical base pairing in the Anton-MD ensembles appear to compensate for lack of sugar-backbone sampling to achieve the inter-helical orientations needed to satisfy the helical RDC data (Supplementary Fig. 2e-g).

## Supplementary Tables

**Supplementary Table 1. RDCs datasets used in this study**

| RNA                       | Elongation | Apical loop | +/- Mg <sup>2+</sup> | Number of RDCs | Reference |
|---------------------------|------------|-------------|----------------------|----------------|-----------|
| U1-TAR                    | E0         | wild-type   | -                    | 35             | 4         |
|                           | E0         | wild-type   | +                    | 38             | 4         |
| U2-TAR                    | E0         | wild-type   | -                    | 27             | 4         |
|                           | EI22       | UUCG        | -                    | 35             | 5         |
| TAR                       | E0         | UUCG        | -                    | 35             | 6         |
|                           | EI22       | UUCG        | -                    | 39             | 5         |
|                           | EII22      | UUCG        | -                    | 34             | 5         |
|                           | EI3        | UUCG        | -                    | 35             | 7         |
|                           | E0         | wild-type   | +                    | 46             | 4         |
| U7-TAR                    | E0         | wild-type   | -                    | 34             | 4         |
|                           | E0         | wild-type   | +                    | 36             | 4         |
| human telomerase P2ab     | E0         | N/A         | -                    | 88             | 8         |
| fluoride riboswitch       | E0         | N/A         | +                    | 89             | 9         |
| preQ1 Class I riboswitch  | E0         | N/A         | -                    | 90             | 10        |
| preQ1 Class II riboswitch | E0         | N/A         | -                    | 132            | 11        |

**Supplementary Table 2. FARFAR input files and commands (TAR)**

|                             |                                                                                                                                                                                                                                                             |
|-----------------------------|-------------------------------------------------------------------------------------------------------------------------------------------------------------------------------------------------------------------------------------------------------------|
| <p>2° structure</p>         | 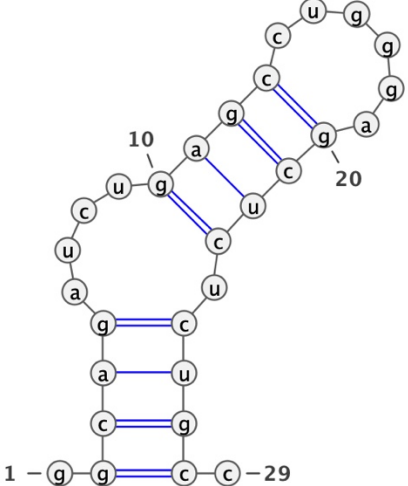                                                                                                                                                                           |
| <p>Input files</p>          | <pre>cat test.fasta &gt; tar ggcagaucugagccugggagcucucugcc  cat test.secstruct .((((.....((((.....)))))).)). ggcagaucugagccugggagcucucugcc</pre>                                                                                                            |
| <p>Generate RNA helices</p> | <pre>rna_helix.py -seq gcag cugc -resnum 2-5 25-28 - o helix_1.pdb -rosetta_folder ~/rosetta/main/source/cmake/build_release rna_helix.py -seq gagc gcuc -resnum 10-13 20-23 -o helix_2.pdb -rosetta_folder ~/rosetta/main/source/cmake/build_release</pre> |
| <p>FARFAR run</p>           | <pre>rna_denovo -nstruct 100 -s helix_*.pdb - secstruct_file test.secstruct -fasta test.fasta -minimize_rna true</pre>                                                                                                                                      |

**Supplementary Table 3. FARFAR input files and commands (U1-TAR)**

|                                 |                                                                                                                                                                                                                                                            |
|---------------------------------|------------------------------------------------------------------------------------------------------------------------------------------------------------------------------------------------------------------------------------------------------------|
| <p>2° structure</p>             |                                                                                                                                                                                                                                                            |
| <p>Input files</p>              | <pre>cat test.fasta &gt; u1-tar ggcagaugagccugggagcucucugcc  cat test.secstruct .((((..(((.....)))))).)))). ggcagaugagccugggagcucucugcc</pre>                                                                                                              |
| <p>Generate<br/>RNA helices</p> | <pre>rna_helix.py -seq gcag cugc -resnum 2-5 23-26 - o helix_1.pdb -rosetta_folder ~/rosetta/main/source/cmake/build_release rna_helix.py -seq gagc gcuc -resnum 8-11 18-21 -o helix_2.pdb -rosetta_folder ~/rosetta/main/source/cmake/build_release</pre> |
| <p>FARFAR<br/>run</p>           | <pre>rna_denovo -nstruct 100 -s helix_*.pdb - secstruct_file test.secstruct -fasta test.fasta -minimize_rna true</pre>                                                                                                                                     |

**Supplementary Table 4. FARFAR input files and commands (U2-TAR)**

|                                 |                                                                                                                                                                                                                                                            |
|---------------------------------|------------------------------------------------------------------------------------------------------------------------------------------------------------------------------------------------------------------------------------------------------------|
| <p>2° structure</p>             | 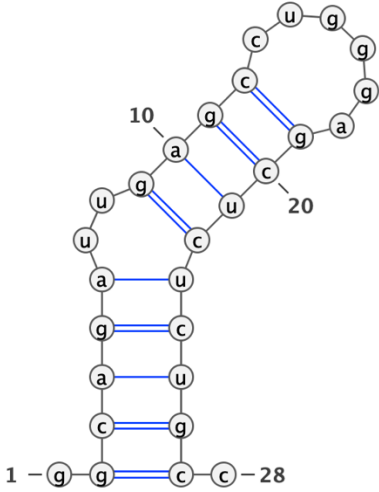                                                                                                                                                                          |
| <p>Input files</p>              | <pre>cat test.fasta &gt; u2-tar ggcagauugagccugggagcucucugcc  cat test.secstruct .((((((..((((.....)))))))))). ggcagauugagccugggagcucucugcc</pre>                                                                                                          |
| <p>Generate<br/>RNA helices</p> | <pre>rna_helix.py -seq gcag cugc -resnum 2-5 24-27 - o helix_1.pdb -rosetta_folder ~/Rosetta/main/source/cmake/build_release rna_helix.py -seq gagc gcuc -resnum 9-12 19-22 -o helix_2.pdb -rosetta_folder ~/rosetta/main/source/cmake/build_release</pre> |
| <p>FARFAR<br/>run</p>           | <pre>rna_denovo -nstruct 100 -s helix_*.pdb - secstruct_file test.secstruct -fasta test.fasta -minimize_rna true</pre>                                                                                                                                     |



**Supplementary Table 5. FARFAR input files and commands (U7-TAR)**

|                                 |                                                                                                                                                                                                                                                             |
|---------------------------------|-------------------------------------------------------------------------------------------------------------------------------------------------------------------------------------------------------------------------------------------------------------|
| <p>2° structure</p>             | 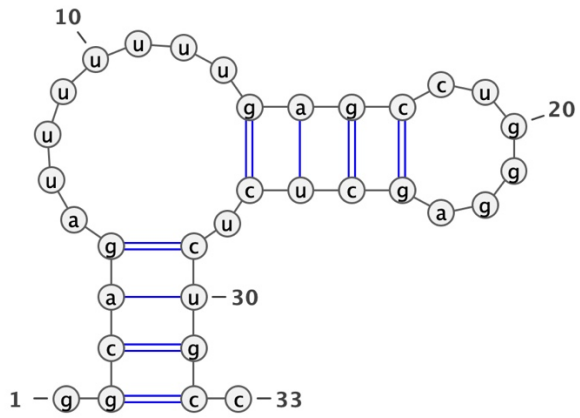                                                                                                                                                                          |
| <p>Input files</p>              | <pre>cat test.fasta &gt; u7-tar ggcagauuuuuuugagccugggagcucucugcc  cat test.secstruct .((((.....(((.....)))))).)). ggcagauuuuuuugagccugggagcucucugcc</pre>                                                                                                  |
| <p>Generate<br/>RNA helices</p> | <pre>rna_helix.py -seq gcag cugc -resnum 2-5 29-32 - o helix_1.pdb -rosetta_folder ~/rosetta/main/source/cmake/build_release rna_helix.py -seq gagc gcuc -resnum 14-17 24-27 -o helix_2.pdb -rosetta_folder ~/rosetta/main/source/cmake/build_release</pre> |
| <p>FARFAR<br/>run</p>           | <pre>rna_denovo -nstruct 100 -s helix_*.pdb - secstruct_file test.secstruct -fasta test.fasta -minimize_rna true</pre>                                                                                                                                      |

**Supplementary Table 6. FARFAR input files and commands (Human Telomerase P2ab)**

|                         |                                                                                                                                                                                                                                                                    |
|-------------------------|--------------------------------------------------------------------------------------------------------------------------------------------------------------------------------------------------------------------------------------------------------------------|
| 2° structure            |                                                                                                                                                                                                                                                                    |
| Input files             | <pre>cat test.fasta &gt; p2ab ggcuuuugcuccccgugcuucggcacggaaaagcc  cat test.secstruct .((((((.....((((([..]))))).))))). ggcuuuugcuccccgugcuucggcacggaaaagcc</pre>                                                                                                  |
| Generate<br>RNA helices | <pre>rna_helix.py -seq gcuuuu aaaagc -resnum 2-7 29-34 -o helix_1.pdb -rosetta_folder ~/rosetta/main/source/cmake/build_release rna_helix.py -seq ccgugc gcacgg -resnum 13-18 23-28 -o helix_2.pdb -rosetta_folder ~/rosetta/main/source/cmake/build_release</pre> |
| FARFAR<br>run           | <pre>rna_denovo -nstruct 100 -obligate_pair_explicit 19 22 S W T -s helix_*.pdb - secstruct_general_file test.secstruct -fasta test.fasta -minimize_rna true</pre>                                                                                                 |

**Supplementary Table 7. FARFAR input files and commands (Fluoride Riboswitch)**

|                                     |                                                                                                                                                                                                                                                                                                                                                                                         |
|-------------------------------------|-----------------------------------------------------------------------------------------------------------------------------------------------------------------------------------------------------------------------------------------------------------------------------------------------------------------------------------------------------------------------------------------|
| <p>2° structure</p>                 | 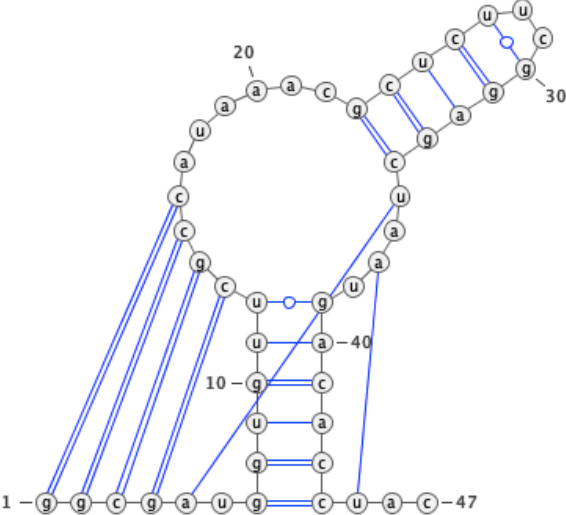                                                                                                                                                                                                                                                                                                      |
| <p>Input files</p>                  | <pre>cat test.fasta &gt; fsw ggcgaugguguucgccauaaacgcucucggagcuaaugacaccuac  cat test.secstruct ((((([{{{({{}})})).....((((...)))](.}}}})).. ggcgaugguguucgccauaaacgcucucggagcuaaugacaccuac</pre>                                                                                                                                                                                       |
| <p>Generate<br/>RNA<br/>helices</p> | <pre>rna_helix.py -seq ggcg cgcc -resnum 1-4 13-16 -o helix_1.pdb -rosetta_folder ~/rosetta/main/source/cmake/build_release rna_helix.py -seq gguguu gacacc -resnum 7-12 39- 44 -o helix_2.pdb -rosetta_folder ~/rosetta/main/source/cmake/build_release rna_helix.py -seq gcuc gagc -resnum 23-26 31-34 -o helix_3.pdb -rosetta_folder ~/rosetta/main/source/cmake/build_release</pre> |
| <p>FARFAR<br/>run</p>               | <pre>rna_denovo -nstruct 100 -obligate_pair_explicit 27 30 S W T 5 35 W W T 37 45 H W T -s helix_*.pdb -secstruct_general_file test.secstruct -fasta test.fasta -minimize_rna true</pre>                                                                                                                                                                                                |

**Supplementary Table 8. FARFAR input files and commands (PreQ1 Class I**

**Riboswitch)**

|                                 |                                                                                                                                                                                                                                   |
|---------------------------------|-----------------------------------------------------------------------------------------------------------------------------------------------------------------------------------------------------------------------------------|
| <p>2° structure</p>             | 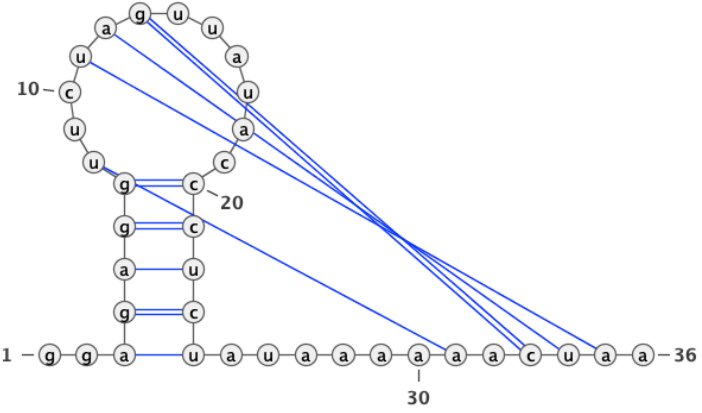                                                                                                                                                |
| <p>Input files</p>              | <pre>cat test.fasta &gt; preq1 class I ggagagguucuaguauauaccucuaauaaaaaacuaa  cat test.secstruct ..((((([..{{{.....}}})).....].)}}}. ggagagguucuaguauauaccucuaauaaaaaacuaa</pre>                                                  |
| <p>Generate<br/>RNA helices</p> |                                                                                                                                                                                                                                   |
| <p>FARFAR run</p>               | <pre>rna_denovo -nstruct 100 -obligate_pair_explicit 4 25 S H T 5 27 S H C 7 30 S W T 8 31 W H C 8 32 W H C 13 18 S W T 20 31 S W C 21 29 S W C -secstruct_general_file test.secstruct -fasta test.fasta -minimize_rna true</pre> |

**Supplementary Table 9. FARFAR input files and commands (PreQ1 Class II Riboswitch)**

|                                 |                                                                                                                                                                                                                                                        |
|---------------------------------|--------------------------------------------------------------------------------------------------------------------------------------------------------------------------------------------------------------------------------------------------------|
| <p>2° structure</p>             |                                                                                                                                                                                                                                                        |
| <p>Input files</p>              | <pre>cat test.fasta &gt; preq1 class II gcuuggugcuuagcuucuuucaccaagcauauuacacgcggaauacc gccaaaggagaa  cat test.secstruct (((((((.....[[[[[.]]]]))))).....{.(((.....)) )})].]]]]]... gcuuggugcuuagcuucuuucaccaagcauauuacacgcggaauacc gccaaaggagaa</pre> |
| <p>Generate<br/>RNA helices</p> |                                                                                                                                                                                                                                                        |
| <p>FARFAR run</p>               | <pre>rna_denovo -nstruct 100 -obligate_pair_explicit 10 52 W H C 11 53 W H C 36 50 H W T 36 52 W S T -secstruct_general_file test.secstruct -fasta test.fasta -minimize_rna true</pre>                                                                 |

## Reference

1. Salmon, L. et al. Modulating RNA Alignment Using Directional Dynamic Kinks: Application in Determining an Atomic-Resolution Ensemble for a Hairpin using NMR Residual Dipolar Couplings. *Journal of the American Chemical Society* **137**, 12954-12965 (2015).
2. Shi, H. et al. Atomic structures of excited state A–T Hoogsteen base pairs in duplex DNA by combining NMR relaxation dispersion, mutagenesis, and chemical shift calculations. *J. Biomol. NMR* **70**, 229-244 (2018).
3. Dethoff, E.A. et al. Characterizing complex dynamics in the transactivation response element apical loop and motional correlations with the bulge by NMR, molecular dynamics, and mutagenesis. *Biophys J* **95**, 3906-15 (2008).
4. Merriman, D.K. et al. Increasing the length of poly-pyrimidine bulges broadens RNA conformational ensembles with minimal impact on stacking energetics. *RNA* **24**, 1363-1376 (2018).
5. Zhang, Q., Stelzer, A.C., Fisher, C.K. & Al-Hashimi, H.M. Visualizing spatially correlated dynamics that directs RNA conformational transitions. *Nature* **450**, 1263-7 (2007).
6. Al-Hashimi, H.M. et al. Concerted motions in HIV-1 TAR RNA may allow access to bound state conformations: RNA dynamics from NMR residual dipolar couplings. *Journal of Molecular Biology* **315**, 95-102 (2002).
7. Dethoff, E.A., Hansen, A.L., Zhang, Q. & Al-Hashimi, H.M. Variable helix elongation as a tool to modulate RNA alignment and motional couplings. *Journal of Magnetic Resonance* **202**, 117-121 (2010).
8. Zhang, Q., Kim, N.K., Peterson, R.D., Wang, Z. & Feigon, J. Structurally conserved five nucleotide bulge determines the overall topology of the core domain of human telomerase RNA. *Proc Natl Acad Sci U S A* **107**, 18761-8 (2010).
9. Zhao, B., Guffy, S.L., Williams, B. & Zhang, Q. An excited state underlies gene regulation of a transcriptional riboswitch. *Nat. Chem. Biol.* **13**, 968-974 (2017).
10. Zhang, Q., Kang, M., Peterson, R.D. & Feigon, J. Comparison of solution and crystal structures of preQ1 riboswitch reveals calcium-induced changes in conformation and dynamics. *J Am Chem Soc* **133**, 5190-3 (2011).
11. Kang, M., Eichhorn, C.D. & Feigon, J. Structural determinants for ligand capture by a class II preQ1 riboswitch. *Proc Natl Acad Sci U S A* **111**, E663-71 (2014).
